# Supplementary material for: New palladium(ii) and platinum(ii) 5,5-diethylbarbiturate complexes with 2-phenylpyridine, 2,2′-bipyridine and 2,2′-dipyridylamine: synthesis, structures, DNA binding, molecular docking, cellular uptake, antioxidant activity and cytotoxicity
Source: Royal Society of Chemistry journal article supplement (doi:10.1039/c5dt00728c), 2015-01-01
Supplement: c5dt00728c1.pdf [file c5dt00728c1.pdf]

## Electronic Supplementary Information (ESI)

# New palladium(II) and platinum(II) 5,5-diethylbarbiturate complexes with 2-phenylpyridine, 2,2'-bipyridine and 2,2'-dipyridylamine: synthesis, structures, DNA/protein binding, molecular docking, antioxidant activity and cytotoxicity

Ceyda Icel, Veysel T. Yilmaz,\* Hale Samli, Yunus Kaya, William T. A. Harrison, Orhan Buyukgungor

### List of contents:

#### Figures

**Fig. S1** Stability of complexes **1**, **2** and **5** in MeOH and a saline solution (0.9% NaCl). Stability values are expressed as the percentage of the complexes remaining in the solution after 24 h.

**Fig. S2** Electronic absorption spectra of complexes **1–6** (25  $\mu$ M each) upon the titration of FS-DNA (0–50  $\mu$ M) in Tris-HCl buffer. The arrow shows the increases in absorbance with respect to an increase in the FS-DNA concentration. The inset shows the linear fit of  $[\text{DNA}]/(\epsilon_a - \epsilon_f)$  vs.  $[\text{DNA}]$ .

**Fig. S3** Emission spectra of EB bound to DNA in the absence and presence of increasing concentrations of complexes **1–6** (12.5–100  $\mu$ M) in Tris-HCl buffer.  $[\text{EB}] = 5.0 \mu\text{M}$ ,  $[\text{DNA}] 50.0 \mu\text{M}$ . The arrows show the changes in intensity upon increasing amounts of the complexes. Insets: Stern-Volmer plot of the fluorescence data.

**Fig. S4** Emission spectra of Hoechst 33258-bound DNA solutions in the absence and presence of increasing concentrations of complexes **1** and **3** (2.5–25  $\mu$ M) in Tris-HCl buffer.  $[\text{Hoechst 33258}] = 5.0 \mu\text{M}$ ,  $[\text{DNA}] 50.0 \mu\text{M}$ . The arrows show the changes in intensity upon increasing amounts of the complexes. Insets: Stern-Volmer plot of the fluorescence data.

**Fig. S5** The relative viscosity of FS-DNA upon addition of increasing amounts of complexes **1–6** in Tris-HCl buffer.  $\eta$  is the viscosity of DNA in the presence of complex, and  $\eta_0$  is the viscosity of DNA alone.  $r = 0.25\text{--}2.0$ .

**Fig. S6** Thermal denaturation profiles of FS-DNA in the absence and in the presence of complexes **1–6** in Tris-HCl buffer at  $r = 0.5$ .

**Fig. S7** Computational docking models (using the Autodock/Vina software) illustrating the interactions between DNA and complexes **1–6**.

#### Tables

**Table S1** Hydrogen bonding interactions and the binding free energy of the most stable docking conformations for complexes **1–6** docked into DNA.

**Fig. S1** Stability of complexes **1**, **2** and **5** in MeOH and a saline solution (0.9% NaCl). Stability values are expressed as the percentage of the complexes remaining in the solution after 24 h.

---

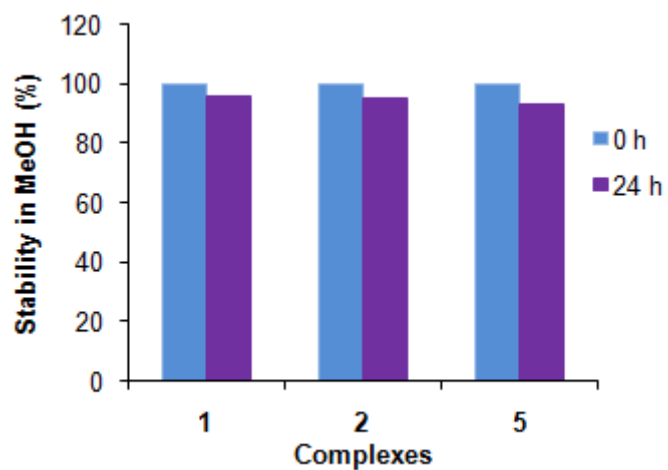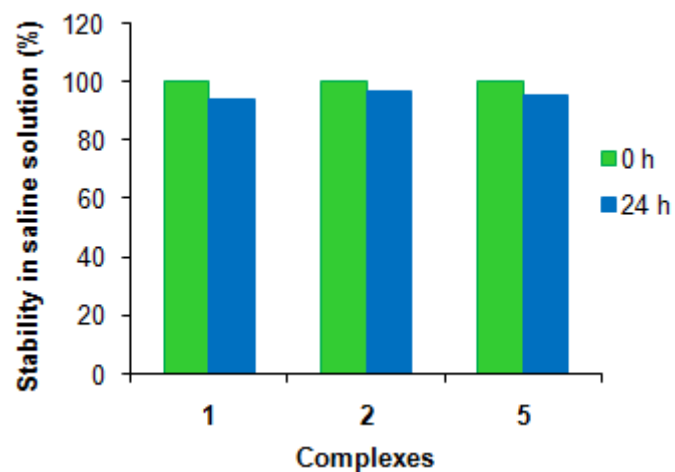

**Fig. S2** Electronic absorption spectra of complexes **1–6** (25  $\mu\text{M}$  each) upon the titration of FS-DNA (0–50  $\mu\text{M}$ ) in Tris-HCl buffer. The arrow shows the increases in absorbance with respect to an increase in the FS-DNA concentration. The inset shows the linear fit of  $[\text{DNA}]/(\epsilon_a - \epsilon_f)$  vs.  $[\text{DNA}]$ .

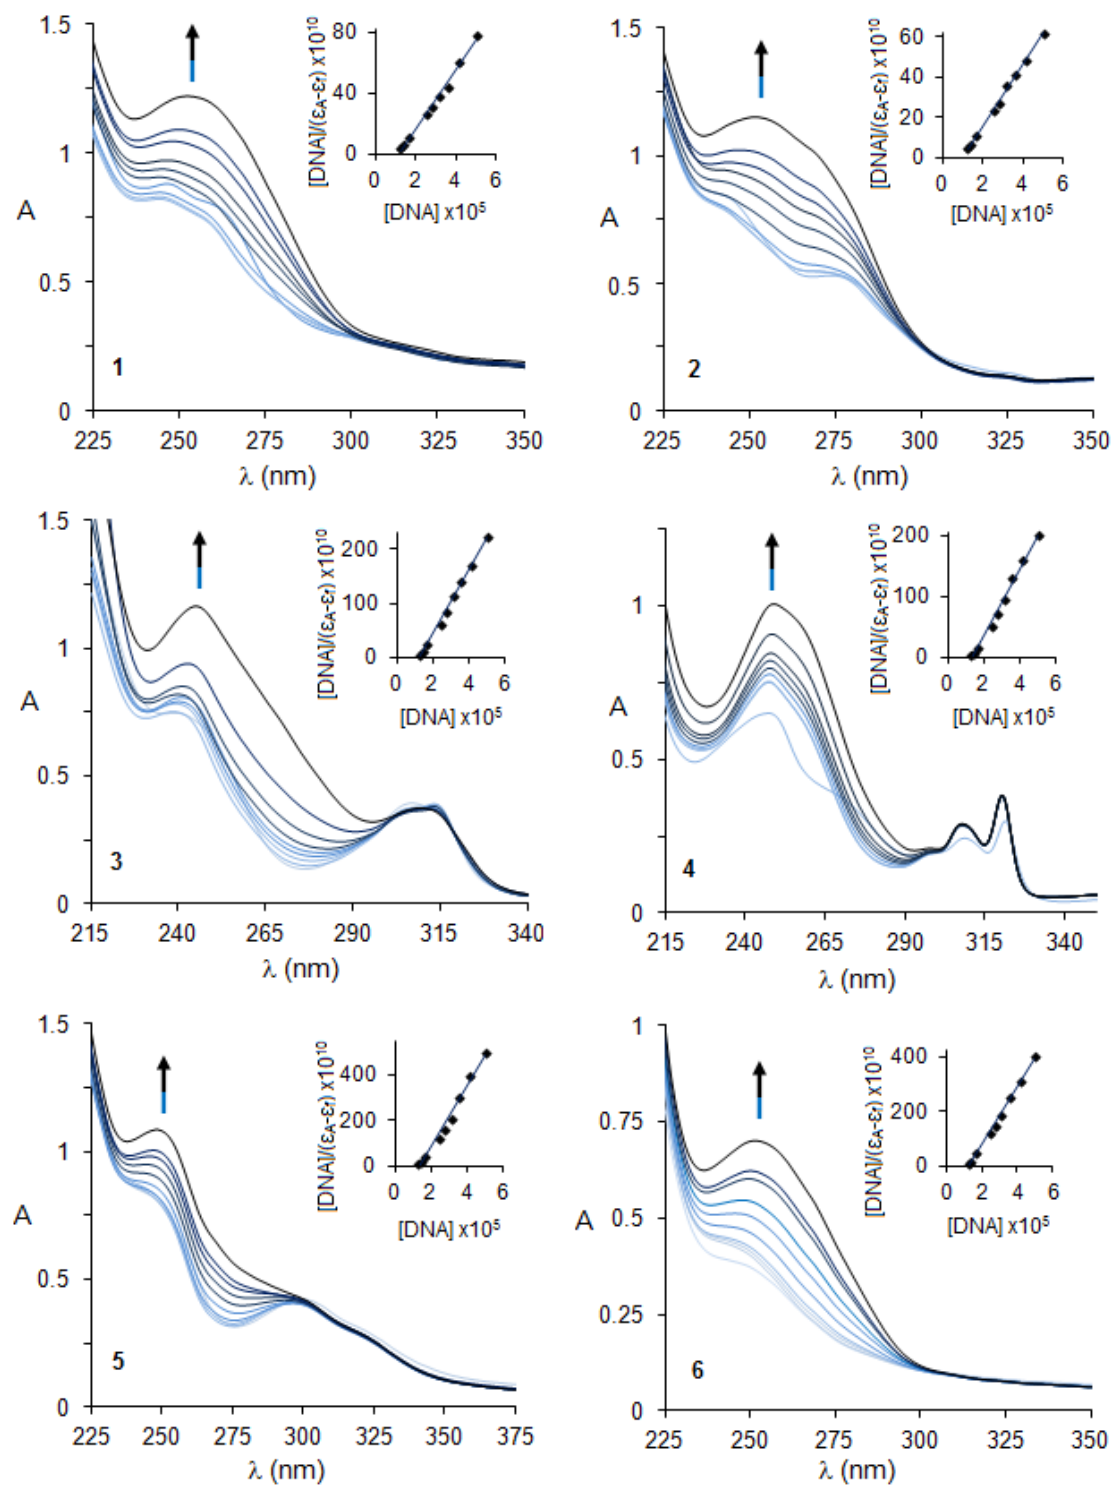

**Fig. S3** Emission spectra of EB bound to DNA in the absence and presence of increasing concentrations of complexes **1–6** (12.5–100  $\mu\text{M}$ ) in Tris-HCl buffer. [EB] = 5.0  $\mu\text{M}$ , [DNA] 50.0  $\mu\text{M}$ . The arrows show the changes in intensity upon increasing amounts of the complexes. Insets: Stern-Volmer plot of the fluorescence data.

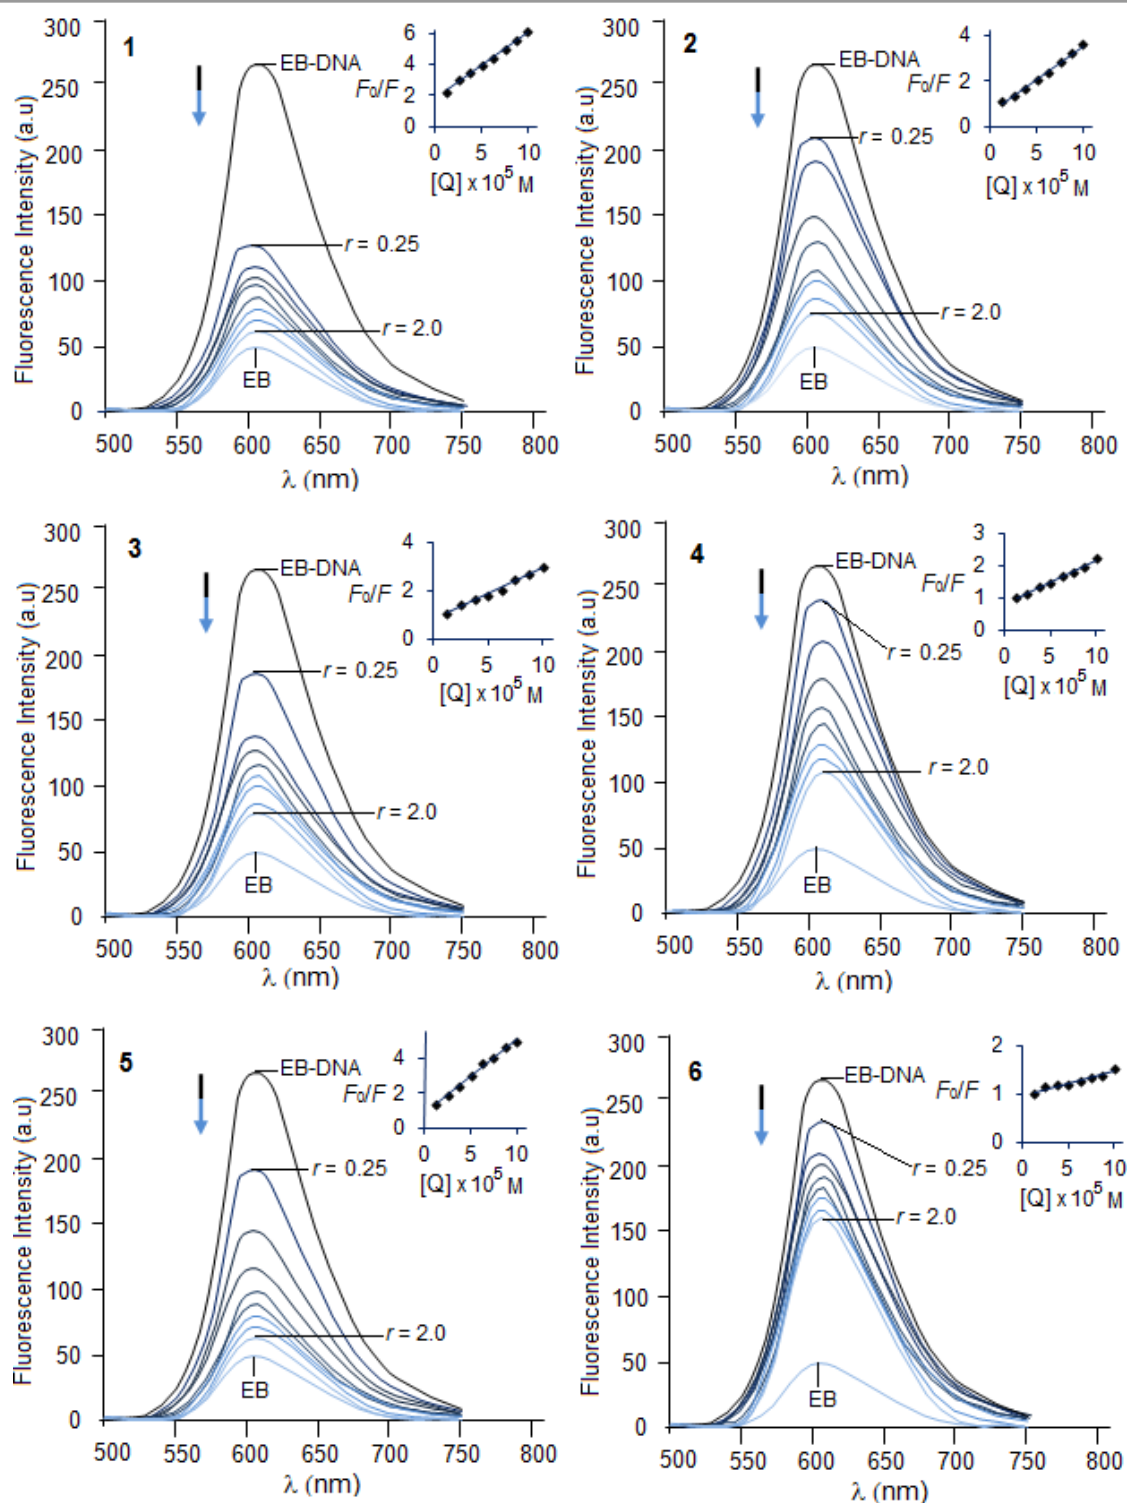

**Fig. S4** Emission spectra of Hoechst 33258-bound DNA solutions in the absence and presence of increasing concentrations of complexes **1** and **3** (2.5–25  $\mu\text{M}$ ) in Tris-HCl buffer. [Hoechst 33258] = 5.0  $\mu\text{M}$ , [DNA] 50.0  $\mu\text{M}$ . The arrows show the changes in intensity upon increasing amounts of the complexes. Insets: Stern-Volmer plot of the fluorescence data.

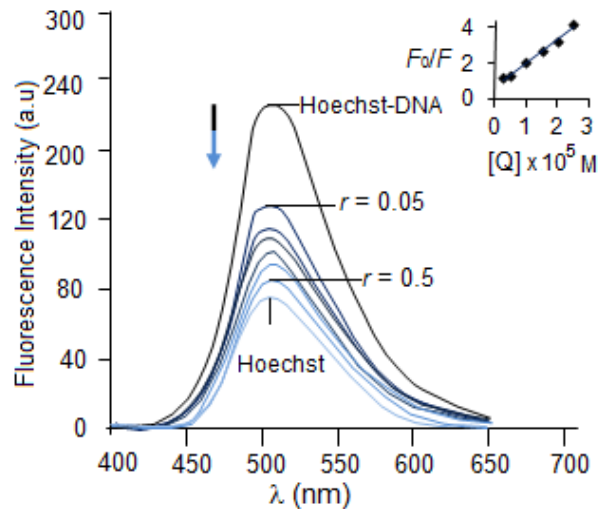

(1)

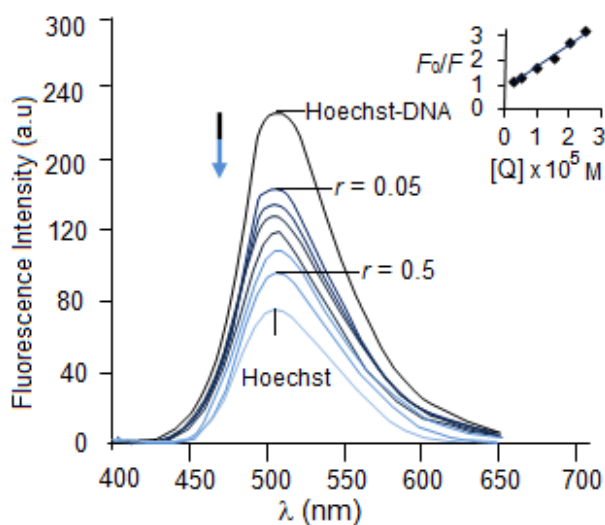

(3)

**Fig. S5** The relative viscosity of FS-DNA upon addition of increasing amounts of complexes **1–6** in Tris-HCl buffer.  $\eta$  is the viscosity of DNA in the presence of complex, and  $\eta_0$  is the viscosity of DNA alone.  $r = 0.25\text{--}2.0$ .

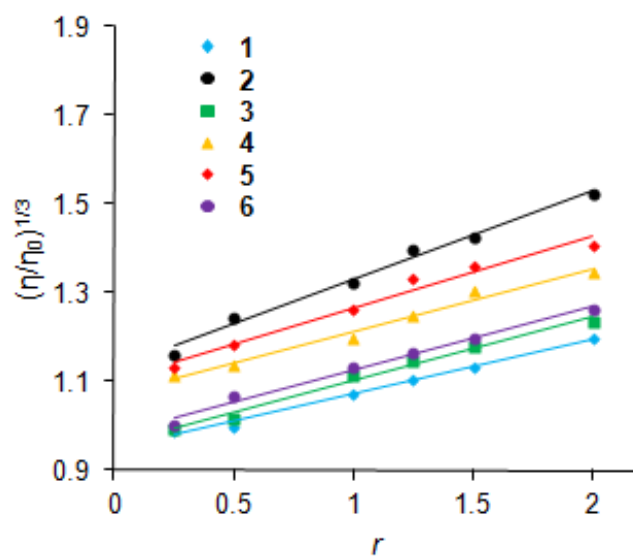



**Fig. S7** Computational docking models (using the Autodock/Vina software) illustrating the interactions between DNA and complexes 1–6.

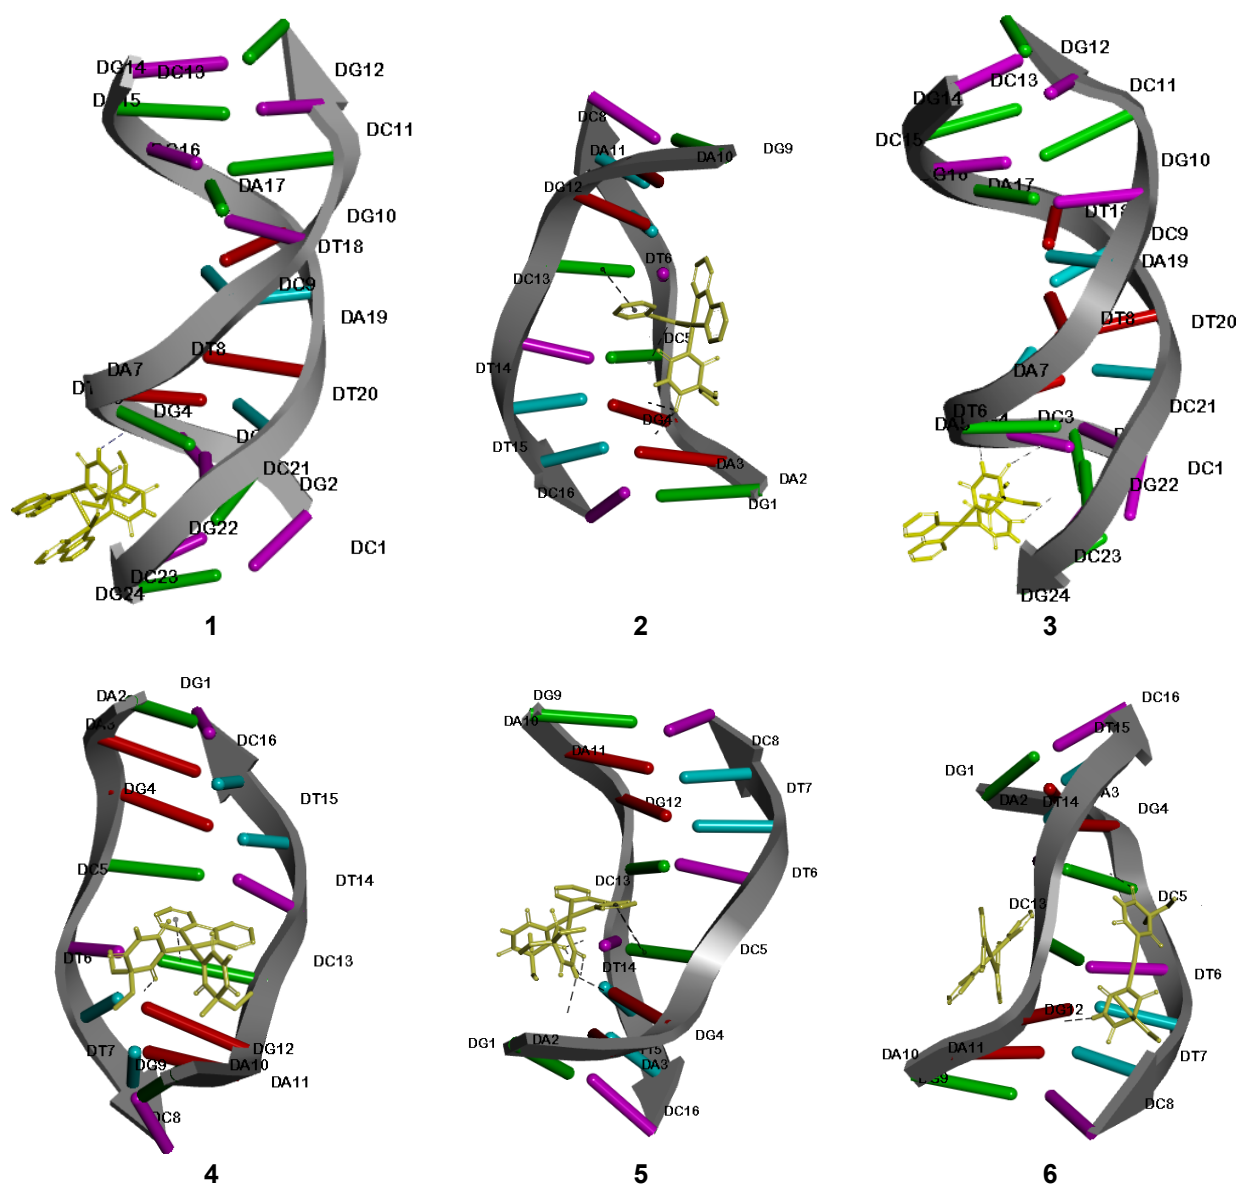



**Table S1** Hydrogen bonding interactions and the binding free energy of the most stable docking conformations for complexes **1–6** docked into DNA

| Complexes | Donor<br>(D–H) | Acceptor<br>(H···A) | H···A<br>(Å) | $\Delta G$<br>(kJ mol <sup>-1</sup> ) |
|-----------|----------------|---------------------|--------------|---------------------------------------|
| <b>1</b>  | N6–H6 (barb)   | O (DG4)             | 2.28         | –32.22                                |
| <b>2</b>  | N–H (DA3)      | O1 (barb)           | 2.31         | –29.71                                |
|           | N–H (DA2)      | O1 (barb)           | 2.48         |                                       |
| <b>3</b>  | N–H (DG2)      | O6 (barb)           | 2.54         | –29.71                                |
|           | N–H (DG4)      | O3 (barb)           | 2.10         |                                       |
|           | N4–H4 (barb)   | O (DG4)             | 2.37         |                                       |
| <b>4</b>  | N–H (DA11)     | O1 (barb)           | 2.08         | –28.03                                |
| <b>5</b>  | N–H (DA3)      | O6 (barb)           | 2.28         | –30.96                                |
|           | N–H (DC13)     | O1 (barb)           | 2.31         |                                       |
|           | N–H (DA3)      | O1 (barb)           | 2.54         |                                       |
|           | N7–H7 (barb)   | N7 (DA3)            | 2.59         |                                       |
|           | N7–H7 (barb)   | N7 (DA2)            | 2.79         |                                       |
| <b>6</b>  | N–H (DC5)      | O2 (barb)           | 2.18         | –27.61                                |
|           | N4–H4 (barb)   | N (DA11)            | 2.89         |                                       |
